# Supplementary material for: Ultrafine Diesel Exhaust Particles Induce Apoptosis of Oligodendrocytes by Increasing Intracellular Reactive Oxygen Species through NADPH Oxidase Activation
Source: MDPI journal article supplement (doi:10.3390/antiox11051031), 2022-05-23
Supplement: s1 [file s1]

## Supplementary Figure

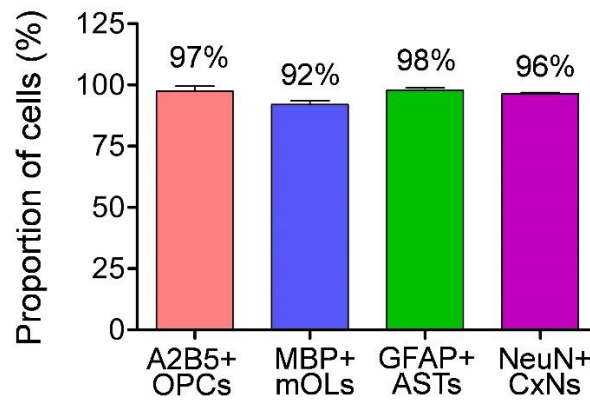

**Figure S1.** High proportions of isolated cells stained with cell-specific markers. The proportions of A2B5-positive OPCs, MBP-positive mOLs, GFAP-positive astrocytes, and NeuN-positive cortical neurons are 97%, 92%, 98%, and 96% among total cells counterstained with DAPI-positive cells, respectively.
